# Supplementary material for: Antibacterial activities ofN-alkyl imidazolium-based poly(ionic liquid) nanoparticles
Source: Royal Society of Chemistry journal article supplement (doi:10.1039/c8py01290c), 2018-11-15
Supplement: c8py01290c1.pdf [file c8py01290c1.pdf]

## Electronic Supplementary Information

### **Antibacterial activities of N-alkyl imidazolium-based poly(ionic liquid) nanoparticles**

Cao Fang, Lingli Kong, Qing Ge, Wei Zhang\*, Xianjing Zhou, Li Zhang, and Xiping Wang

*Department of Chemistry, School of Science, Zhejiang Sci-Tech University Hangzhou 310018, China.*

*Corresponding author: Wei Zhang (E-mail: [zhwei@zstu.edu.cn](mailto:zhwei@zstu.edu.cn); [zwzist@163.com](mailto:zwzist@163.com))*

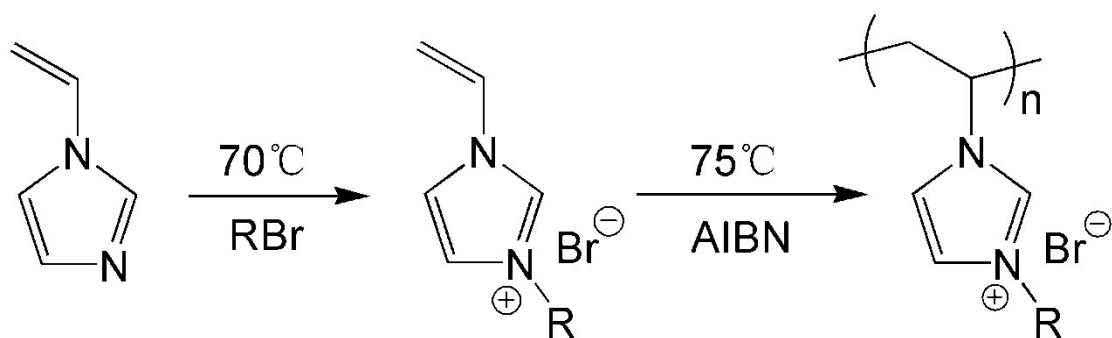

**Fig. S1.** General synthetic route of poly[C<sub>n</sub>VIm<sup>+</sup>][Br<sup>-</sup>] (n = 8, 10, 12 and 16)

**Table S1** Yields and molecular weights of poly[C<sub>n</sub>VIm<sup>+</sup>][Br<sup>-</sup>] (n = 8, 10, 12 and 16)

| Samples                                                   | Yield | Molecular weight |      |
|-----------------------------------------------------------|-------|------------------|------|
|                                                           |       | Mn               | PDI  |
| poly[C <sub>8</sub> VIm <sup>+</sup> ][Br <sup>-</sup> ]  | 78%   | 16855            | 1.52 |
| poly[C <sub>10</sub> VIm <sup>+</sup> ][Br <sup>-</sup> ] | 81%   | 16231            | 1.73 |
| poly[C <sub>12</sub> VIm <sup>+</sup> ][Br <sup>-</sup> ] | 80%   | 12379            | 1.72 |
| poly[C <sub>16</sub> VIm <sup>+</sup> ][Br <sup>-</sup> ] | 76%   | 10841            | 1.58 |

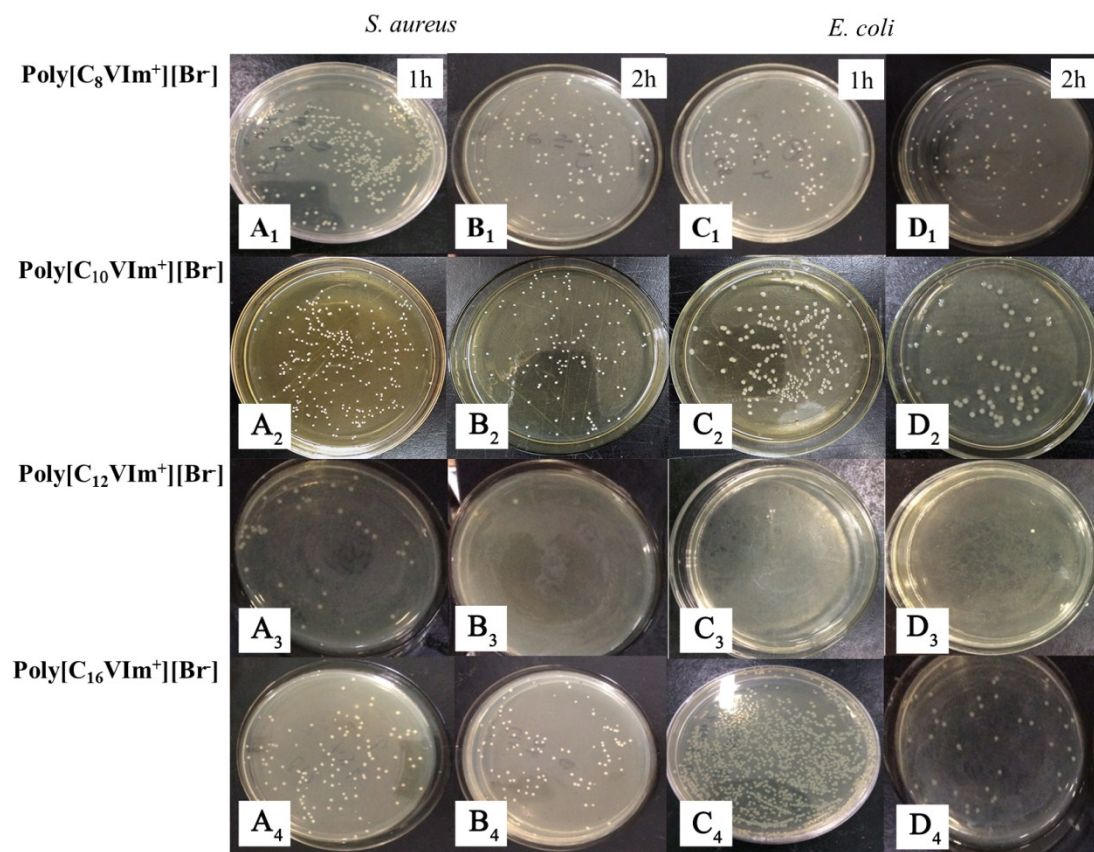

**Fig. S2.** Number of colony forming units (CFU) of *E. coli* and *S. aureus* treated with PIL nanoparticles at different contacting hours. (A<sub>1</sub>-D<sub>1</sub>) poly[C<sub>8</sub>VIm<sup>+</sup>][Br<sup>-</sup>]; (A<sub>2</sub>-D<sub>2</sub>) poly[C<sub>10</sub>VIm<sup>+</sup>][Br<sup>-</sup>]; (A<sub>3</sub>-D<sub>3</sub>) poly[C<sub>12</sub>VIm<sup>+</sup>][Br<sup>-</sup>]; (A<sub>4</sub>-D<sub>4</sub>) poly[C<sub>16</sub>VIm<sup>+</sup>][Br<sup>-</sup>].

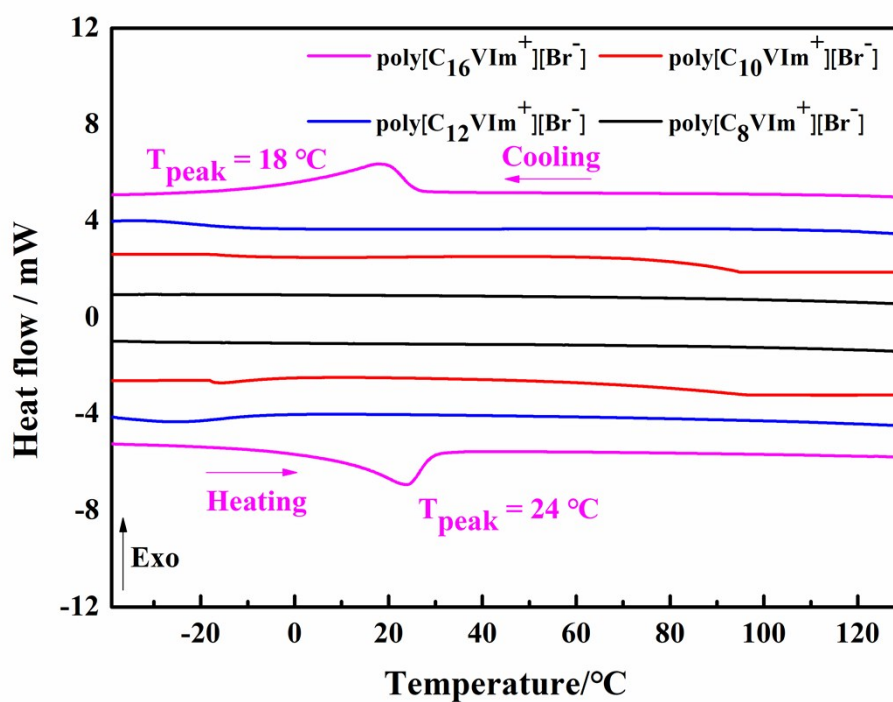

**Fig. S3.** Differential scanning calorimetry (DSC) curves of poly[C<sub>n</sub>VIm<sup>+</sup>][Br<sup>-</sup>] (n = 8, 10, 12 and 16)

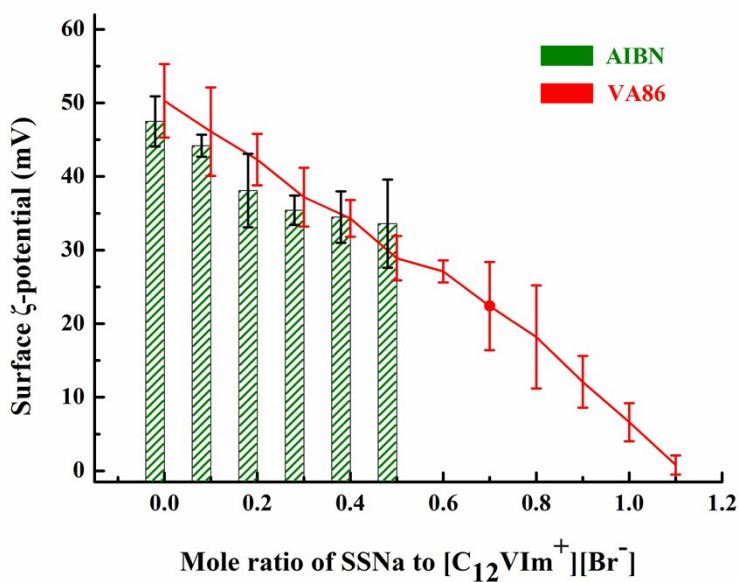

**Fig. S4.** Surface  $\zeta$ -potential of poly[C<sub>12</sub>VIm<sup>+</sup>][Br<sup>-</sup>]-r-PSSNa with different SSNa content prepared by using AIBN and VA86 as initiator.

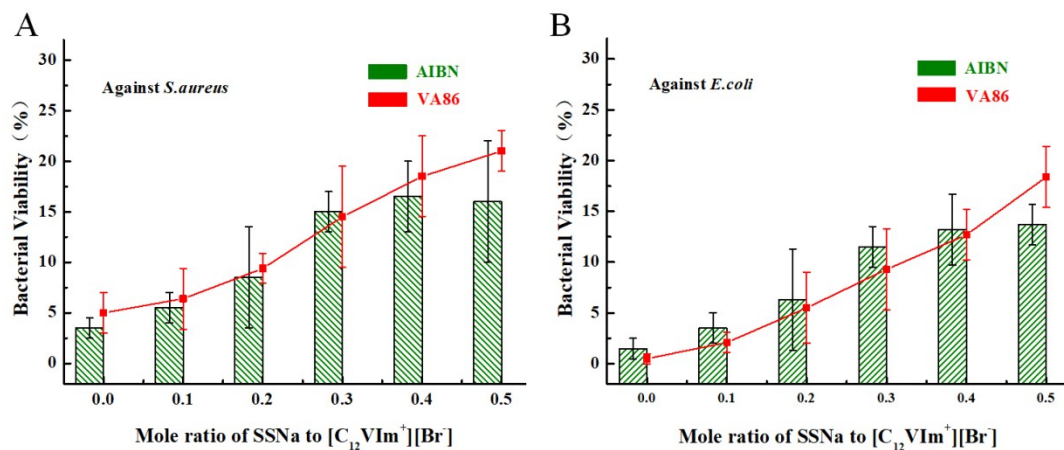

**Fig. S5.** Bacterial viabilities of (A) *S. aureus* and (B) *E. coli* after contacting with poly $[C_{12}VIm^+][Br^-]$ -r-PSSNa for 1 h; The random copolymers were synthesized by using AIBN (green column) and VA86 (red line) as initiator respectively.

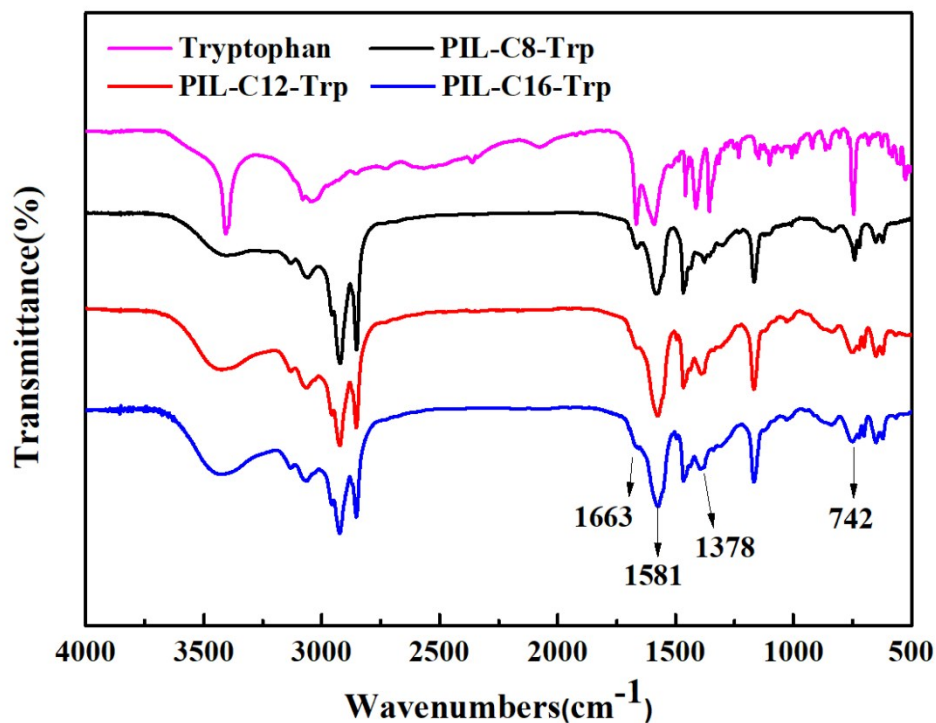

**Fig. S6.** FT-IR spectra of PIL-Trp.

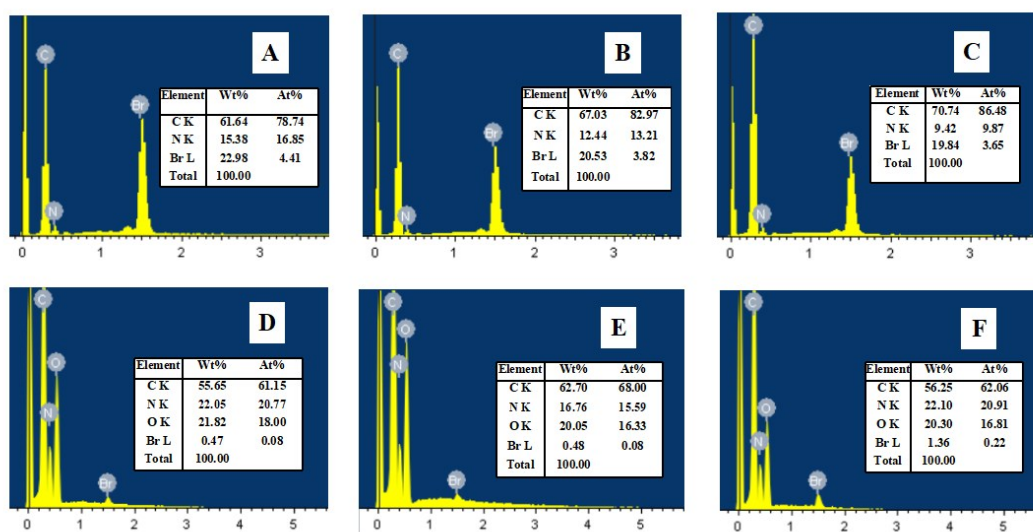

**Fig. S7.** Energy dispersive X-ray (EDX) spectra of (A) poly[C<sub>8</sub>VIm<sup>+</sup>][Br<sup>-</sup>], (B) poly[C<sub>12</sub>VIm<sup>+</sup>][Br<sup>-</sup>], (C) poly[C<sub>16</sub>VIm<sup>+</sup>][Br<sup>-</sup>], (D) poly[C<sub>8</sub>VIm<sup>+</sup>][Trp<sup>-</sup>], (E) poly[C<sub>12</sub>VIm<sup>+</sup>][Trp<sup>-</sup>] and (F) poly[C<sub>16</sub>VIm<sup>+</sup>][Trp<sup>-</sup>].

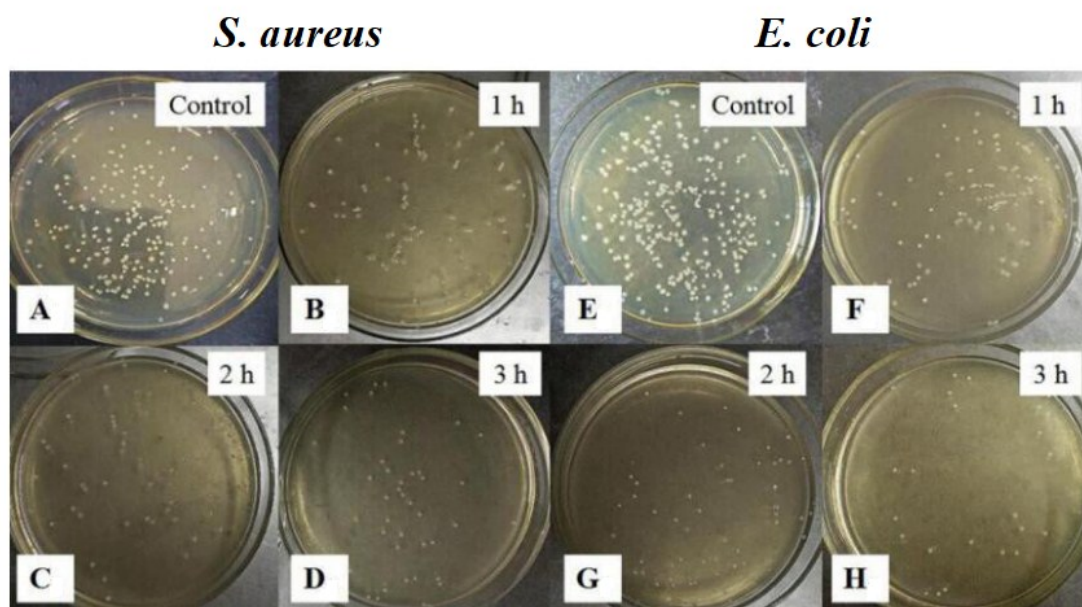

**Fig. S8.** Number of colony forming units (CFU) of *E. coli* and *S. aureus* after treated with poly[C<sub>8</sub>VIm<sup>+</sup>][Trp<sup>-</sup>] for 1-3 h.

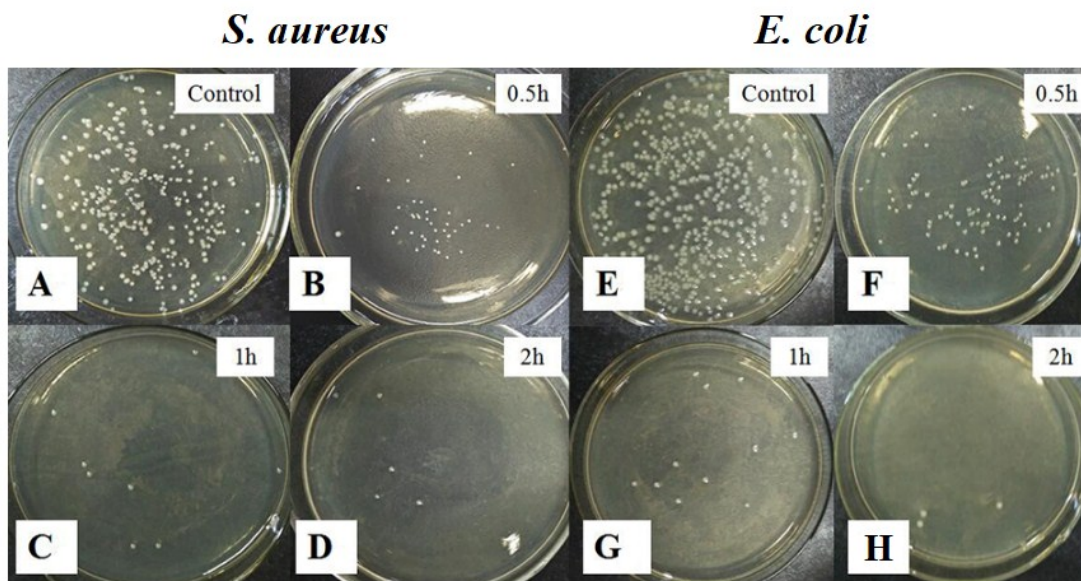

**Fig. S9.** Number of colony forming units (CFU) of *E. coli* and *S. aureus* after treated with poly[C<sub>12</sub>VIm<sup>+</sup>][Trp<sup>-</sup>] for 0.5-2 h.

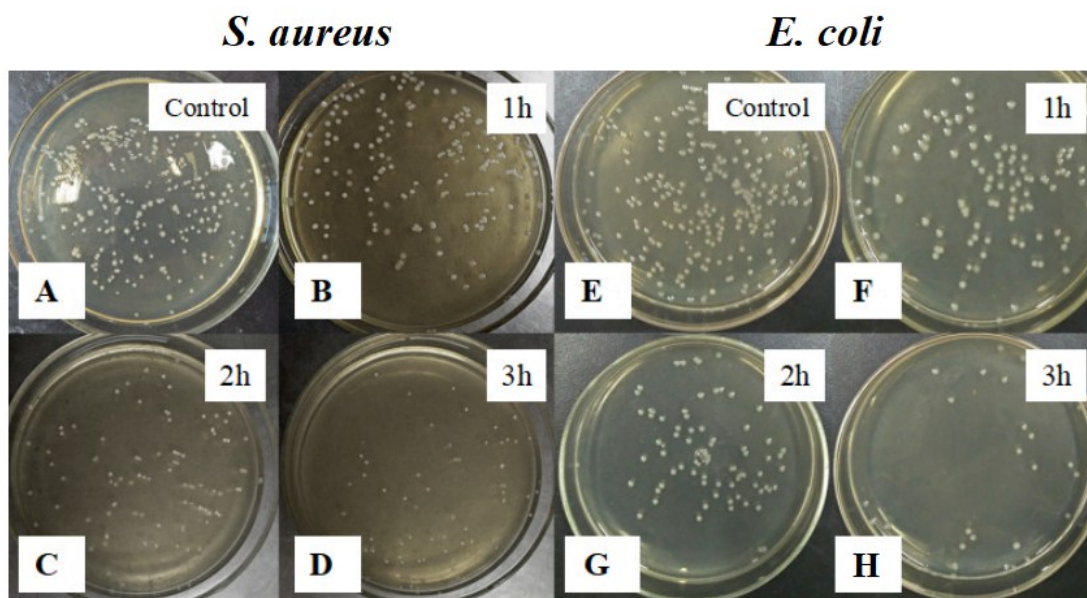

**Fig. S10.** Number of colony forming units (CFU) of *E. coli* and *S. aureus* after treated with poly[C<sub>16</sub>VIm<sup>+</sup>][Trp<sup>-</sup>] for 1-3 h.

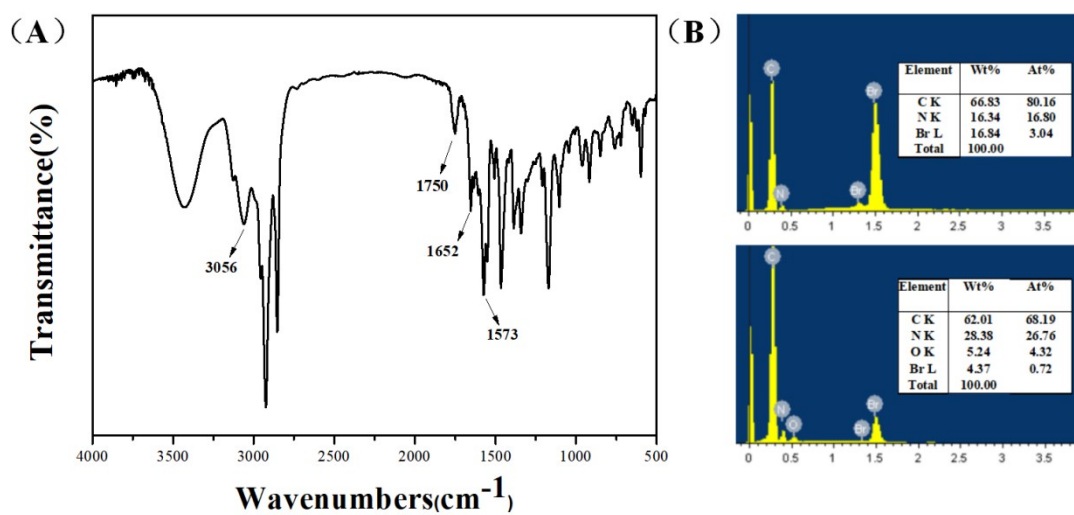

**Fig. S11.** (A) FT-IR spectra of poly[C<sub>12</sub>VIm<sup>+</sup>][Flu<sup>-</sup>]; (B) Energy dispersive X-ray (EDX) spectra of the poly[C<sub>12</sub>VIm<sup>+</sup>][Br<sup>-</sup>] and poly[C<sub>12</sub>VIm<sup>+</sup>][Flu<sup>-</sup>].
